# Supplementary material for: Younger age at diagnosis predisposes to mucosal recovery in celiac disease on a gluten-free diet: A meta-analysis
Source: PubMed Central journal article supplement (PMC5695627; doi:10.1371/journal.pone.0187526), 2017-11-02
Supplement: pone.0187526.s002.pdf [file pone.0187526.s002.pdf]

## S2 APPENDIX

### Search strategy in EMBASE

- #1 celiac
- #2 #1 AND disease
- #3 #1 AND patients
- #4 #2 NOT (celiac AND trunk)
- #5 healing
- #6 recovery
- #7 mucosal AND (#5 OR #6)
- #8 villous AND atrophy
- #9 persistent AND #8
- #10 follow-up
- #11 #7 OR #8
- #12 #2 AND #11

### Searchkey in EMBASE

*celiac AND ('disease'/exp OR disease) AND (mucosal AND ('healing'/exp OR healing OR 'recovery'/exp OR recovery) OR (villous AND ('atrophy'/exp OR atrophy)))*

### Searchkey in PUBMED

*celiac[All Fields] AND ("disease"[MeSH Terms] OR "disease"[All Fields]) AND (((("mucous membrane"[MeSH Terms] OR ("mucous"[All Fields] AND "membrane"[All Fields]) OR "mucous membrane"[All Fields] OR "mucosal"[All Fields]) AND (("wound healing"[MeSH Terms] OR ("wound"[All Fields] AND "healing"[All Fields]) OR "wound healing"[All Fields] OR "healing"[All Fields]) OR recovery[All Fields])) OR (villous[All Fields] AND ("atrophy"[MeSH Terms] OR "atrophy"[All Fields])))*

### Searchkey in Cochrane Trials and Web of Science

*celiac AND disease AND ((mucosal AND healing) OR (mucosal AND recovery) OR (villous AND atrophy))*

## Data extraction

Numeric and texted data were collected as follows.

Publication:

- first author, year and journal
- country
- recruitment period
- study design (prospective or retrospective)

Data for statistical analyses:

- number of participants in the eligible group(s)
- number of males in the eligible group(s) or male/total ratio
- age at diagnosis (years)
- duration of gluten-free diet (months)
- histological classification (with definitions if provided)
- initial histology
- follow-up histology

Data for methodological quality assessment:

- details on sampling procedure
- details on sample preparation
- details on histological assessment and inter-observer agreement
- details on dietary assessment (tool, timing and executor)
- duration of gluten-free diet (months)
- selection criteria
- initial histology
- data on follow-up (drop-out)
